# Supplementary material for: Combining multi-scale 3D printing technologies to engineer reinforced hydrogel-ceramic interfaces
Source: PubMed Central journal article supplement (PMC7116207; doi:10.1088/1758-5090/ab69d9), 2020-02-19
Supplement: EMS96600-supplement-Supplementary_material.pdf [file EMS96600-supplement-Supplementary_material.pdf]

## Supplementary data

### Supplementary methods

#### 1. X-ray diffraction pattern

X-ray diffraction patterns were recorded with a Bruker D8 Advance system (Bruker, Karlsruhe, Germany) in a 2Theta range from 20-40° with Cu K $\alpha$  radiation (40 KV/ 40 mA) with a step size of 0.02° and a total measurement time of 1 s/step. Quantification was performed by Rietveld refinement analysis using Topas software (Bruker, Germany). The amorphous content of the samples was calculated using the G-factor method with a crystalline corundum reference according to Hurle *et al* [S1].

### Supplementary Tables

| Amount of cells    | Day 3    | Day 7     | Day 14    |
|--------------------|----------|-----------|-----------|
| Mean               | 1602.62  | 6568.07   | 10201.17  |
| Standard Deviation | ± 570.00 | ± 3256.64 | ± 5992.86 |

**Supplementary Table 1.** Proliferation of equine MSCs on C-PCaP scaffolds during cultivation for 14 days

| Sample  | $\alpha$ -TCP [%] | Hydroxyapatite [%] | $\beta$ -TCP [%] | amorph [%] |
|---------|-------------------|--------------------|------------------|------------|
| Powder  | 80                | 1.3                | 3.7              | 15         |
| C-PCaP  | 1.4               | 62.3               | 1.4              | 35         |
| NC-PCaP | 1.2               | 64.7               | 2                | 32         |

**Supplementary Table 2:** Quantification of the XRD patterns by Rietveld refinement (TOPAS software, Bruker, USA), showing the conversion of  $\alpha$ -TCP to an apatite phase.

## Supplementary Figures

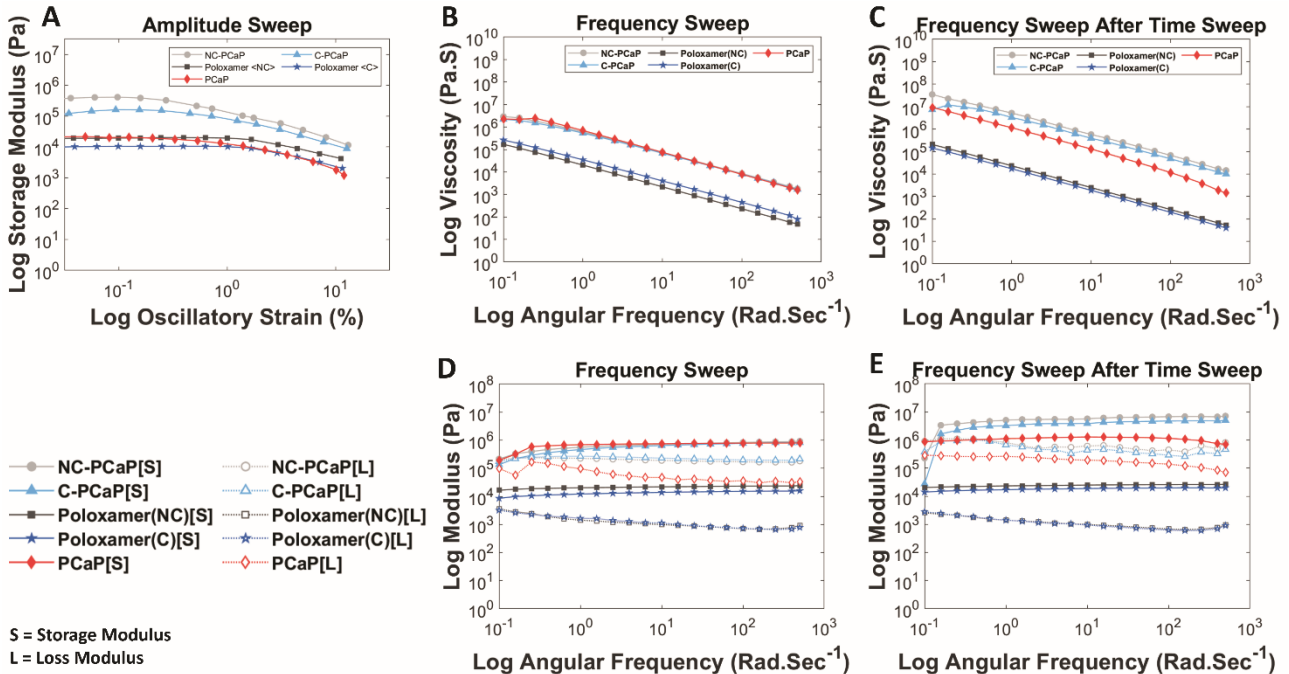

**Supplementary Figure S1:** A; Amplitude sweep representing LVR, B; Frequency sweep (relationship between angular frequency and complex viscosity), C; Frequency sweep (relationship between angular frequency and complex viscosity, obtained by using same material after performing time sweep test), D ; Frequency sweep (relationship between angular frequency and modulus), E; Frequency sweep (relationship between angular frequency and modulus, obtained by using same material after performing time sweep test).

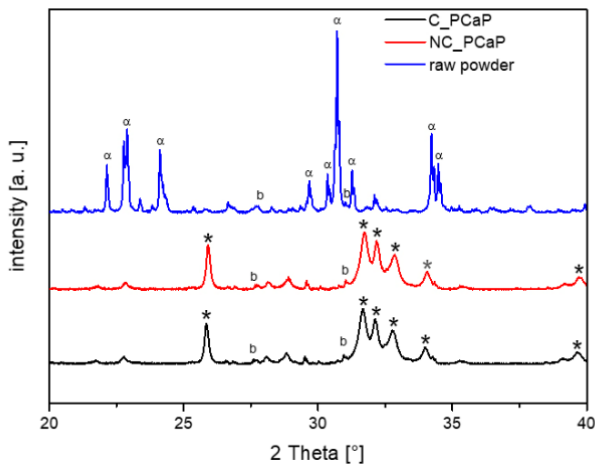

**Supplementary Figure S2:** X-ray diffraction patterns of raw powder and scaffolds. Diffraction peaks in the raw powder can be assigned to crystalline  $\alpha$ -tricalcium phosphate (PDF-No.: 09-0438) with a minor fraction of  $\beta$ -tricalcium phosphate (PDF-No.: 09-0169, marked with “b”), possibly present as minor impurity in the  $\alpha$ -TCP particle formulation. The fabricated scaffolds consisted of low crystalline hydroxyapatite (PDF-No.: 09-0432) from hydrolysis of  $\alpha$ -TCP, as shown by the typical broad peaks peculiar of CDHA formation [S2], while the  $\beta$ -TCP fraction remained unreacted. ( $\alpha$  =  $\alpha$ -TCP, b =  $\beta$ -TCP, \* = CDHA)

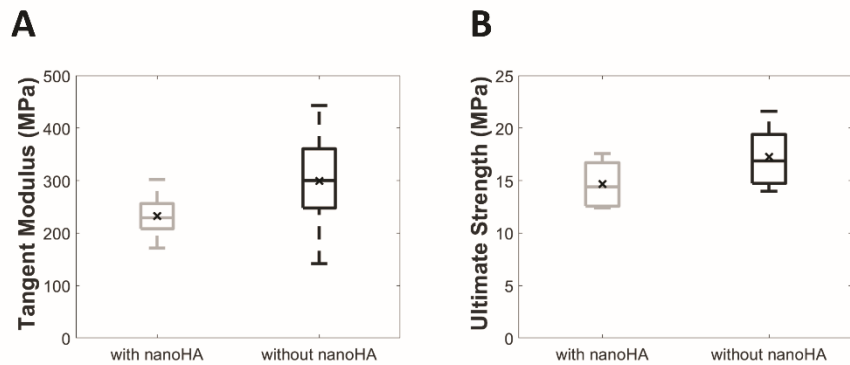

**Supplementary Figure S3:** Tangent Modulus of hardened cement structure produced from composition of  $\alpha$ -TCP with and without nano-hydroxyapatite, B; Ultimate strength of hardened structure produced from composition of  $\alpha$ -TCP with and without nano-hydroxyapatite. No significant differences were found between the two groups, suggesting that the added nano-HA does not have a relevant impact on the compressive properties of the produced cement. (n = 6 for each group).

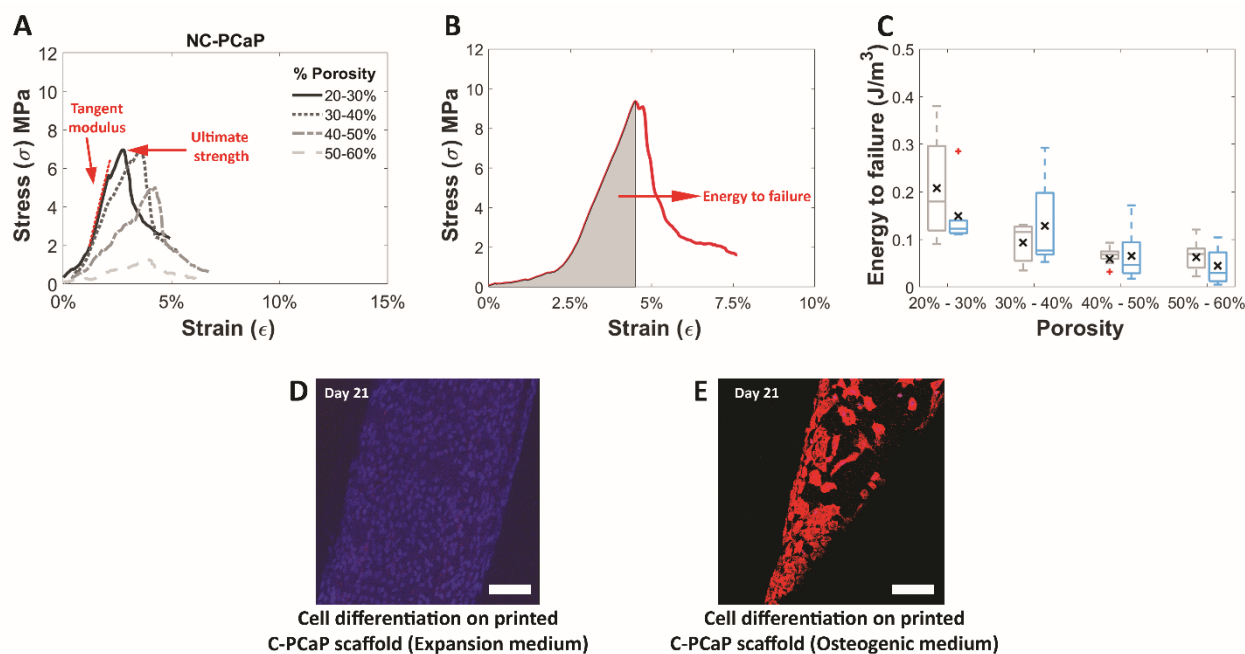

**Supplementary Figure S4:** A; Representative stress-strain curves of NC-PCaP scaffolds at different porosities showing how to calculate tangent modulus and ultimate strength. B; Representative stress-strain curve showing how to calculate energy to failure. C; Energy to failure of NC-PCaP paste (grey) and C-PCaP paste (blue) scaffolds with different porosities. D; Merged image between fluorescence staining of nucleus (dapi: blue) and osteonectin protein (osteonectin: red) of equine MSCs that were cultured on a C-PCaP scaffold for 21 days in an expansion medium showed no sign of osteogenic upregulation. (Scale Bar = 100  $\mu$ m.) E; Merged image between fluorescence staining of nucleus (dapi: blue) and osteonectin protein (osteonectin: red) of equine MSCs that were cultured on a C-PCaP scaffold for 21 days in an osteogenic supplement medium showed signs of osteogenic upregulation. (Scale Bar = 100  $\mu$ m.)

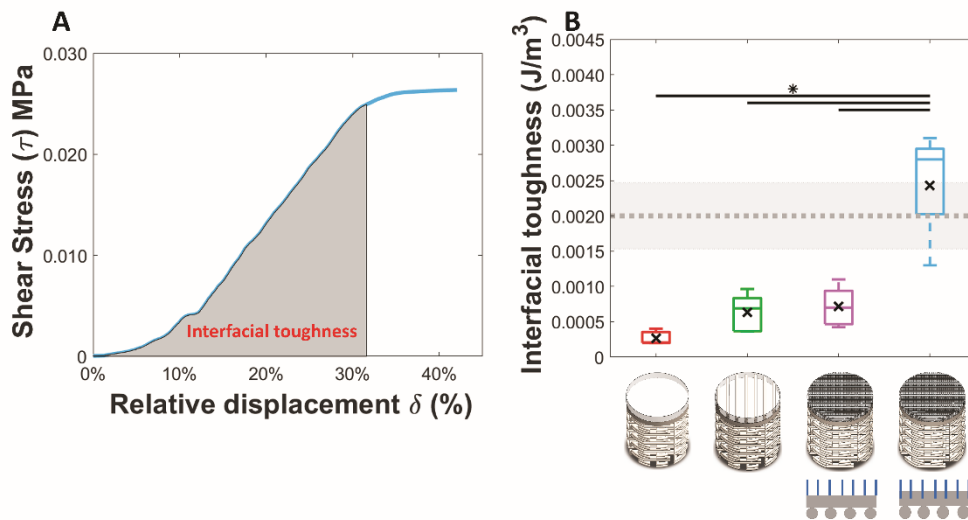

**Supplementary Figure S5:** A; Representative area under stress-displacement curve for calculation energy to failure. B; Interfacial toughness at the interface between chondral and bony compartment of an engineered osteochondral unit showing alterations due to differences in either interfacial architecture or compositions. The different construct types: GelMA on ceramic(unmodified surface; red), GelMA on ceramic (modified surface; bright green), microfibre reinforced GelMA on ceramic(non-anchor fibre; pink), microfibre reinforced GelMA on ceramic (anchor fibre; blue) and only GelMA hydrogel (mean (grey dotted line)  $\pm$  SD (grey filled area))

**Supplementary Video SV1.** Video showing the open and interconnected porosity within the inner structure of the porous 3D printed scaffolds, as shown through a series of  $\mu$ CT sections of the constructs.

### Supplementary references

[S1] Hurle, K.; Neubauer, J.; Bohner, M.; Doebelin, N.; Goetz-Neunhoeffler, F, Effect of amorphous phases during the hydraulic conversion of alpha-TCP into calcium-deficient hydroxyapatite, *Acta Biomaterialia*, 2014, 10, 3931-3941

[S2] Barba A, Diez-Escudero A, Maazouz Y, Rappe K, Espanol M, Montufar EB, Bonany M, Sadowska JM, Guillem-Marti J, Öhman-Mägi C, Persson C, Manzanares MC, Franch J, Ginebra MP. Osteoinduction by Foamed and 3D-Printed Calcium Phosphate Scaffolds: Effect of Nanostructure and Pore Architecture. *ACS Appl Mater Interfaces*. 9(48) (2017) 41722-36.
